# Supplementary material for: Novel carbon and sulfur-tolerant anode material FeNi3@PrBa(Fe,Ni)1.9Mo0.1O5+δ for intermediate temperature solid oxide fuel cells
Source: Royal Society of Chemistry journal article supplement (doi:10.1039/c9ta07027c), 2019-01-01
Supplement: c9ta07027c1.pdf [file c9ta07027c1.pdf]

## Supplementary information

### **Novel carbon and sulfur tolerant anode material $\text{FeNi}_3$ @ $\text{PrBa}(\text{Fe,Ni})_{1.9}\text{Mo}_{0.1}\text{O}_{5+\delta}$ for IT-SOFCs**

Shuangshuang Xue,<sup>a</sup> Nai Shi,<sup>a</sup> Yanhong Wan,<sup>a</sup> Zheqiang Xu,<sup>a</sup> Daoming Huan,<sup>a</sup> Shaowei Zhang,<sup>a</sup> Changrong Xia,<sup>a</sup> Ranran Peng,<sup>\*a,b,c</sup> Yalin Lu<sup>\*a,b,c,d</sup>

<sup>a</sup> Science and Engineering, University of Science and Technology of China, Hefei, 230026 Anhui, China.

<sup>b</sup> Synergetic Innovation Center of Quantum Information & Quantum Physics, University of Science and Technology of China, Hefei, Anhui 230026, China.

<sup>c</sup> Hefei National Laboratory of Physical Science at the Microscale, University of Science and Technology of China, Hefei, 230026 Anhui, China.

<sup>d</sup> National Synchrotron Radiation Laboratory, University of Science and Technology of China, Hefei 230026, P. R. China.

\*. Corresponding author.

Table. S1 Rietveld refinement results for PBFMNi0.3 and FeNi<sub>3</sub>@PBFMNi0.3 samples: lattice parameters and

| Sample                       | Space group | a (Å) | b (Å) | c (Å) | R <sub>wp</sub> (%) | R <sub>p</sub> (%) | χ <sup>2</sup> |
|------------------------------|-------------|-------|-------|-------|---------------------|--------------------|----------------|
| PBFMNi0.3                    | Pm-3m       | 3.905 | 3.905 | 3.905 | 7.27                | 5.10               | 2.71           |
| FeNi <sub>3</sub> @PBFMNi0.3 | Pm-3m       | 3.938 | 3.938 | 3.938 | 6.89                | 5.15               | 3.20           |

corresponding fitting errors

Table. S2 Oxygen partial pressure (P<sub>O2</sub>) of humidified 5% H<sub>2</sub>/Ar and 10% H<sub>2</sub>/Ar at different temperatures.

| Temperature (°C) | P <sub>O2</sub> (atm)  |                        |
|------------------|------------------------|------------------------|
|                  | 5% H <sub>2</sub> /Ar  | 10% H <sub>2</sub> /Ar |
| 550              | $7.93 \times 10^{-27}$ | $1.98 \times 10^{-27}$ |
| 600              | $4.93 \times 10^{-25}$ | $1.23 \times 10^{-25}$ |
| 650              | $1.97 \times 10^{-23}$ | $4.91 \times 10^{-24}$ |
| 700              | $5.41 \times 10^{-22}$ | $1.35 \times 10^{-22}$ |
| 750              | $1.07 \times 10^{-20}$ | $2.69 \times 10^{-20}$ |

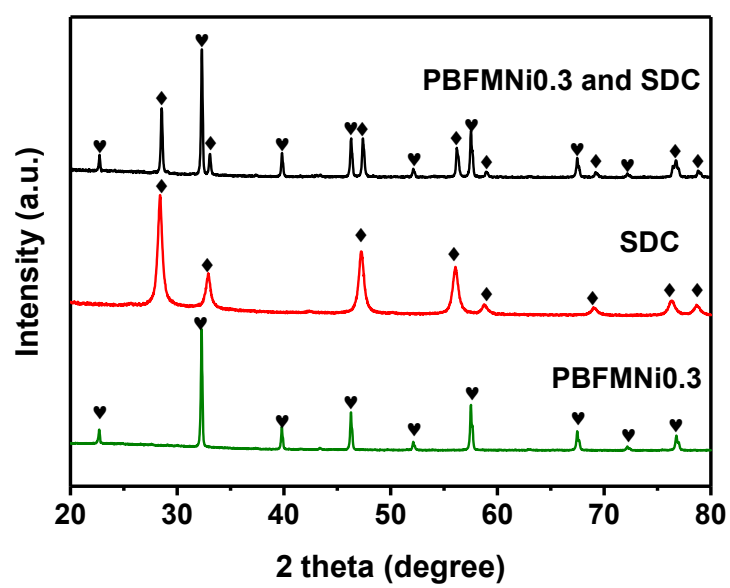

Figure. S1 RT-XRD patterns for PBFMNi0.3 powders, SDC powders and their mixtures calcined at 1000 °C in air for 2 hours.

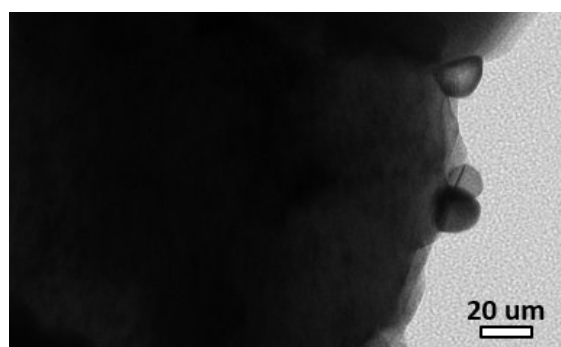

Figure. S2 TEM image of FeNi<sub>3</sub>@PBFMNi0.3

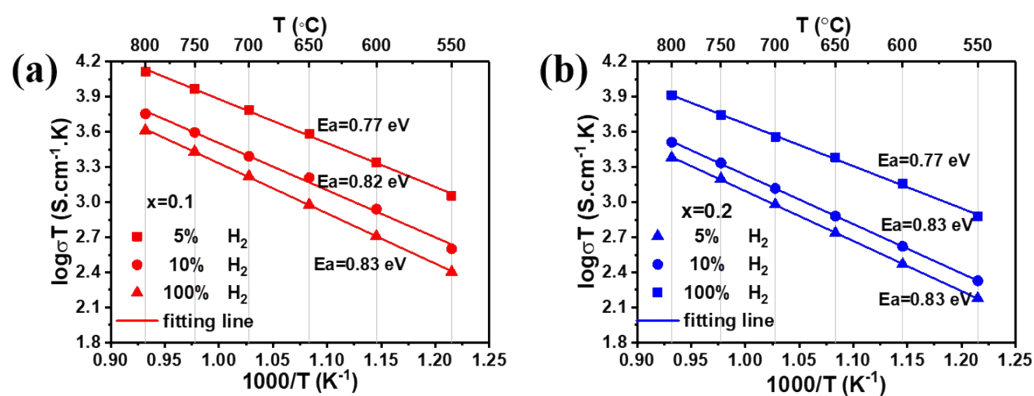

Figure. S3 Arrhenius plots of conductivities for (a) FeNi<sub>3</sub>@PBFMNi<sub>0.1</sub> and (b) FeNi<sub>3</sub>@PBFMNi<sub>0.2</sub> measured at 550-800 °C in wet 5% H<sub>2</sub>/Ar, 10% H<sub>2</sub>/Ar and 100% H<sub>2</sub>, respectively.

ECR technique is based on the equilibrium relationship between the electrical conductivity and the oxygen concentration of nonstoichiometric oxide materials. The conductivity evolution of a sample after an abrupt change in  $P_{\text{O}_2}$  of the ambient atmosphere is recorded as a function of time. A typical model used to estimate surface oxygen

exchange coefficient ( $k_{chem}$ ) and oxygen diffusion coefficient ( $D_{cnem}$ ) in ECR analysis is to solve the linear diffusion equation (Fick's second law) with linear absorbing boundary conditions. The corresponding analytical solution is given by

$$g(t) = \frac{\sigma(t) - \sigma(0)}{\sigma(\infty) - \sigma(0)} = \frac{c(t) - c(0)}{c(\infty) - c(0)} = 1 - \sum_{m=1}^{\infty} \sum_{n=1}^{\infty} \sum_{p=1}^n \frac{2L_{\beta}^2 \exp\left(-\beta_m^2 Dt/x^2\right)}{\beta_m^2 (\beta_m^2 + L_{\beta}^2 + L_{\gamma})} \times \frac{2L_{\gamma}^2 \exp\left(-\gamma_n^2 Dt/y^2\right)}{\gamma_n^2 (\gamma_n^2 + L_{\gamma}^2 + L_{\phi})}$$

Where  $g(t)$  is the normalized conductivity,  $\sigma(0)$  and  $\sigma(\infty)$  represent the initial and final conductivities, respectively, and  $c(0)$  and  $c(\infty)$  are the corresponding oxygen concentrations. Parameters  $x$ ,  $y$  and  $z$  are the sample dimensions, while  $\beta_m, \gamma_n, \phi_p$  are the positive, non-zero roots of

$$\beta_m \tan \beta_m = L_{\beta}; \gamma_n \tan \gamma_n = L_{\gamma}; \phi_p \tan \phi_p = L_{\phi}$$

The eigenvalues

$$L_{\beta} = \frac{x}{L_c}; L_{\gamma} = \frac{y}{L_c}; L_{\phi} = \frac{z}{L_c}$$

Where

$$L_c = \frac{D_{cnem}}{k_{chem}}$$

The parameters obtained from fitting are the chemical surface exchange coefficient,  $k_{chem}$  ( $\text{m.s}^{-1}$ ) and the chemical diffusion coefficient,  $D_{cnem}$  ( $\text{m}^2.\text{s}^{-1}$ ). When the sample is thin enough, which often means its thickness is smaller than the characteristic thickness  $L_c$ , the diffusion step is so fast that the incorporation reaction is limited only by the surface exchange. What's more, the relative change of the oxygen concentration as a function of time is

$$\frac{\partial c(t)}{\partial t} = - \frac{S k_{chem}}{t} [c(t) - c(0)]$$

In this case, the normalized conductivity obtained in experiment is fitted with the surface exchange controlling E

$$g(t) = \exp\left(-\frac{S}{V} k_{chem} t\right)$$

exponential function

Where  $S$  ( $\text{m}^2$ ) is the sample surface area and  $V$  ( $\text{m}^3$ ) is the sample volume.

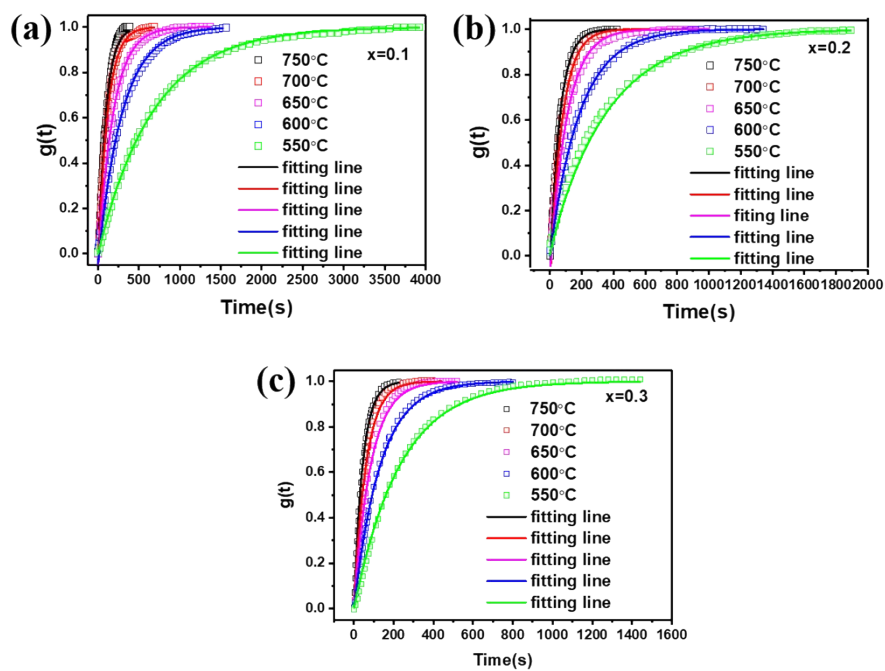

Figure. S4 Electrical conductivity relaxation curves of (a) FeNi<sub>3</sub>@PBFMNI0.1, (b) FeNi<sub>3</sub>@PBFMNI0.2 and (c) FeNi<sub>3</sub>@PBFMNI0.3 at 550-750 °C

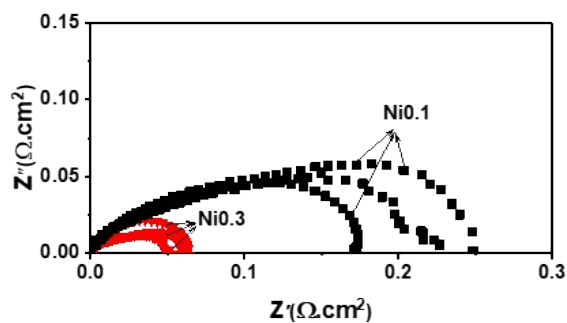

Figure. S5 EIS of button cells using PBFMNI0.1-SDC (black) and PBFMNI0.3-SDC (red) anodes, respectively, operating in wet H<sub>2</sub>.

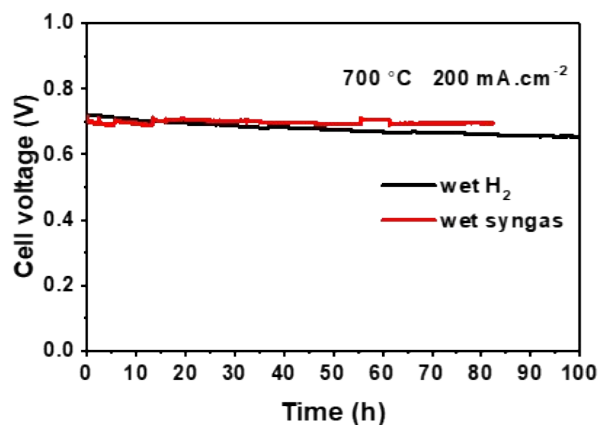

Figure. S6 Cell voltage as a function of testing time for single-cell PBFMNi0.3-SDC|SDC|LSCF-SDC operated under a constant current density of  $200 \text{ mA cm}^{-2}$  at  $700^\circ\text{C}$ .

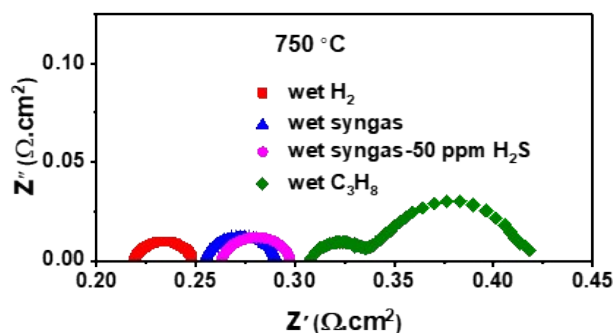

Figure. S7 EIS of SDC electrolyte-supported single-cell PBFMNi0.3-SDC|SDC|LSCF-SDC operating in wet  $\text{H}_2$ , wet propane, wet syngas and syngas-50 ppm  $\text{H}_2\text{S}$ , respectively at  $750^\circ\text{C}$ .

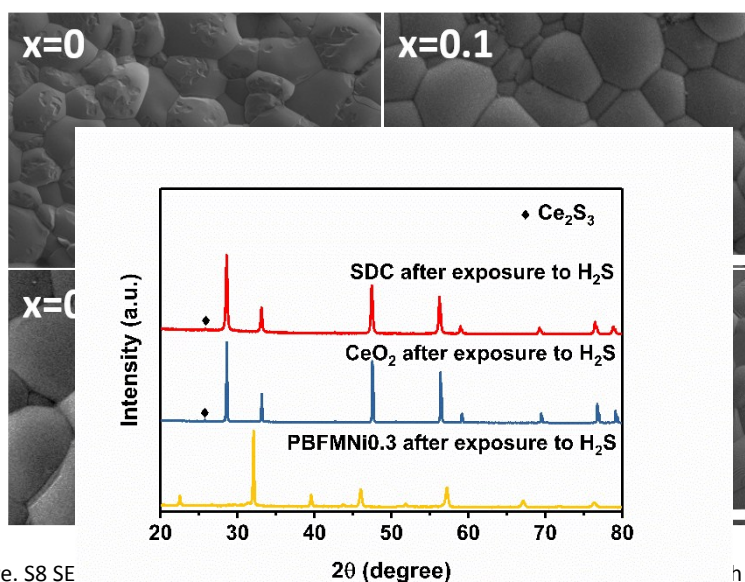

Figure. S8 SE

h in air.

Figure S9 XRD patterns for PBFMNi0.3 powders,  $\text{CeO}_2$  powders and SDC powders after exposure to  $\text{H}_2$  with 50 ppm  $\text{H}_2\text{S}$  for 20 h at  $750^\circ\text{C}$

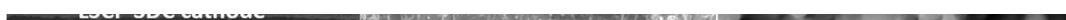

Figure. S10 the SEM images: (a) Cross-sectional view of a whole cell consisting of a PBFMNi0.3-SDC anode and a LSCF-SDC cathode; (b) a PBFMNi0.3-SDC anode and a SDC dense electrolyte; (c) a PBFMNi0.3-SDC anode; (d) Cross-sectional view of a whole cell after 100 h long-term test in syngas with 50 ppm H<sub>2</sub>S; (e) a FeNi<sub>3</sub>@PBFMNi0.3-SDC anode and a SDC dense electrolyte after 100 h long-term test in syngas with 50 ppm H<sub>2</sub>S; (f) FeNi<sub>3</sub>@PBFMNi0.3-SDC anode after long term test in syngas with 50 ppm H<sub>2</sub>S.
